# Supplementary material for: TASK-3 Gene Knockdown Dampens Invasion and Migration and Promotes Apoptosis in KATO III and MKN-45 Human Gastric Adenocarcinoma Cell Lines
Source: PubMed Central journal article supplement (PMC6928893; doi:10.3390/ijms20236077), 2019-12-02
Supplement: ijms-20-06077-s001.pdf [file ijms-20-06077-s001.pdf]

**Table S1.** Primer sets used for RT-qPCR analysis.

| Gene          | Common Name     | GenBank Accession | Abbreviation    | Primer Pair, Sense (5'-3')                 | Product Size (bp) |
|---------------|-----------------|-------------------|-----------------|--------------------------------------------|-------------------|
| <i>KCNK9</i>  | K2P9,<br>TASK-3 | NM_001282534.1    | qHsKCNK9_F<br>1 | 5'-GTC TCA TTT TCC CCC ACC TTT CCA<br>G-3' | 148               |
|               |                 |                   | qHsKCNK9_R<br>1 | 5'-GGG TGG GGT GAG AAA TGT AAG<br>GCA-3'   |                   |
| <i>KCNK3</i>  | K2P3,<br>TASK-1 | NM_002246.2       | qHnP3_F         | 5'-GGT GCT CAT CGG CTT CTT CT-3'           | 199               |
|               |                 |                   | qHnP3_R         | 5'-GAA GCT GAA GGC CAC GTA CT-3'           |                   |
| <i>CCNA1</i>  | Cyclin<br>A1    | NM_003914.3       | qHsCCNA1_F      | 5'-TGA AAT AAG GCA CAG ACC CAA<br>AGC A-3' | 89                |
|               |                 |                   | qHsCCNA1_R      | 5'-ACC AGC CAG TCC ACC AGA ATC GT-<br>3'   |                   |
| <i>CCND1</i>  | Cyclin<br>D1    | NM_053056.2       | qHsCCND1_F      | 5'-GCT CCT GTG CTG CGA AGT GGA A-3'        | 126               |
|               |                 |                   | qHsCCND1_R      | 5'-TTT GAA GTA GGA CAC CGA GGG CG-<br>3'   |                   |
| <i>CCNE1</i>  | Cyclin<br>E1    | NM_001238.2       | qHsCCNE1_F      | 5'-AAG GTT TCA GGG TAT CAG TGG TGC<br>G-3' | 191               |
|               |                 |                   | qHsCCNE1_R      | 5'-GGC TTT CTT TGC TCG GGC TTT G-3'        |                   |
| <i>CDK4</i>   | CDK4            | NM_000075.3       | qHsCDK4_F       | 5'-TCG TGA GGT GGC TTT ACT GAG GCG-<br>3'  | 194               |
|               |                 |                   | qHsCDK4_R       | 5'-TCC TTG ATC GTT TCG GCT GGC A-3'        |                   |
| <i>CDKN1A</i> | p21,<br>Cip1    | NM_001291549.1    | qHsCDKN1A_F     | 5'-TGT CCG TCA GAA CCC ATG C-3'            | 139               |
|               |                 |                   | qHsCDKN1A_R     | 5'-AAA GTC GAA GTT CCA TCG CTC-3'          |                   |
| <i>CDKN1B</i> | p27,<br>Kip1    | NM_004064.4       | qHsCDKN1B_F     | 5'-GGG TCT GTG TCT TTT GGC TCC GA-3'       | 94                |
|               |                 |                   | qHsCDKN1B_R     | 5'-CCG CCT CTC TCG CAC TCT CAA A-3'        |                   |
| <i>RPL19</i>  | L19             | NM_000981         | qHsRPL19_F      | 5'-CAT CCG CAA GCC TGT GAC G-3'            | 132               |
|               |                 |                   | qHsRPL19_R      | 5'-TGT GAC CTT CTC TGG CAT TCG-3'          |                   |

K2P, two-pore domain potassium channels; TASK-1 and TASK-3, TWIK-related acid-sensitive K<sup>+</sup> channels 1 and 3; DRAM1, CCNA1, CCND1 and CCNE1, Cyclins A1, D1, and E1; CDK4, Cyclin-Dependent Kinase 4; CDKN1A and CDKN1B, Cyclin-Dependent Kinase Inhibitors 1A and 1B; RPL19, ribosomal protein L19.

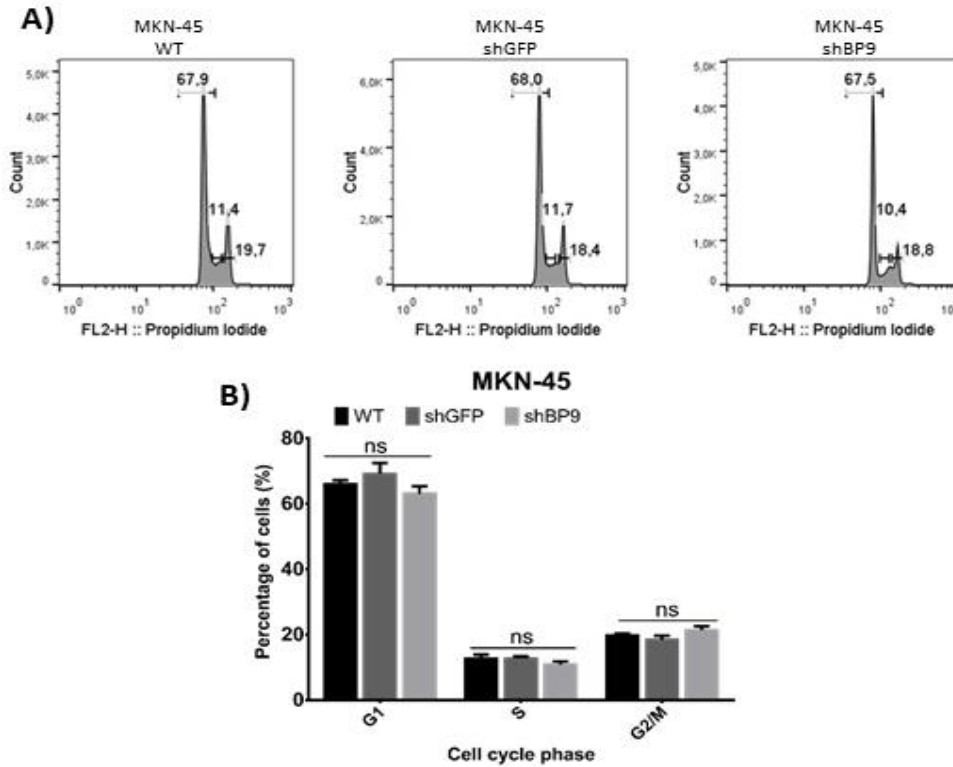

**Figure S1.** Quantitation of cell cycle phases by propidium iodide staining in MKN-45 cells. **(A)** Histograms. Representing distributions of fluorescence intensity among wild type (WT) MKN-45 cells or the same cells. Transduced with an shRNA against GFP (shGFP) or Task-3 (shBP9) after staining with propidium iodide. **(B)** Percentage of cells in G1, S and G2/M cell cycle phases based on percentages obtained in A. Error bars correspond to the mean  $\pm$  SME of three independent experiments. Cell cycle phases were evaluated by two-way ANOVA test with a  $p \leq 0.05$  ns = no significant difference.
